# Supplementary material
Source: Springer Nature journal article supplement (https://www.springermedizin.de/resource/supplementary/12914_2005_28_MOESM1_ESM.pdf/9537364)
Supplement: MOESM1 [file 9537364]

**PREDISPOSING FACTORS**

- ◆ age
- ◆ gender
- ◆ ethnicity
- ◆ education

**ENABLING FACTORS**

- ◆ household economic status
- ◆ out of pocket health expenditure

**HEALTH SYSTEM FACTORS**

- ◆ availability of health services/providers
- ◆ distance of health facilities

**Perceived illness/self-reported illness**

**Health-seeking Behaviour**

- ◆ self care (including self treatment)
- ◆ traditional providers
- ◆ unqualified allopaths
- ◆ semi-qualified allopaths
- ◆ qualified professionals
